# Supplementary material
Source: Springer Nature journal article supplement (https://www.springermedizin.de/resource/supplementary/12885_2013_3968_MOESM1_ESM.pdf/9464860)
Supplement: MOESM1 [file 9464860]

**A****Normal urothelia**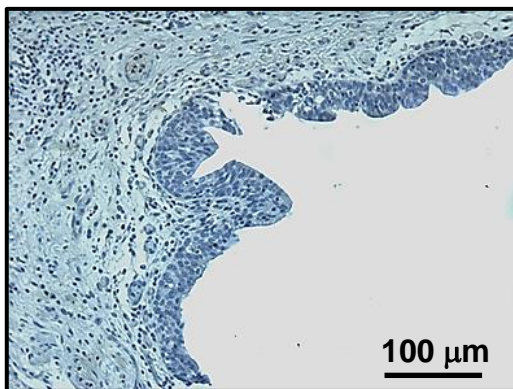**200  $\times$** **B****Bladder Cancer (pT1 Low grade)**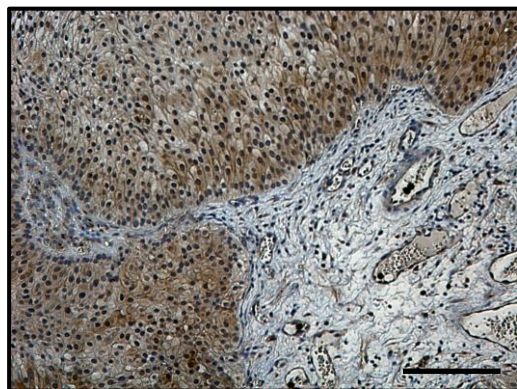**200  $\times$** **C****Bladder Cancer (pT2 High grade)****Adjacent normal urothelia**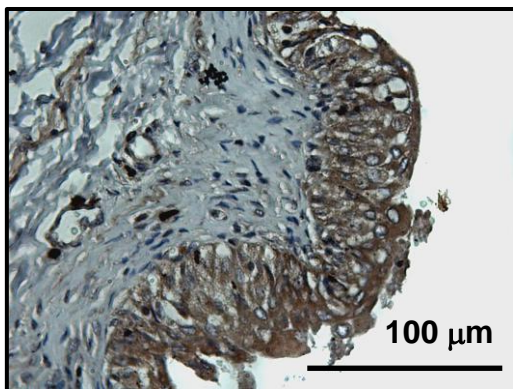**400  $\times$** **Cancer cells**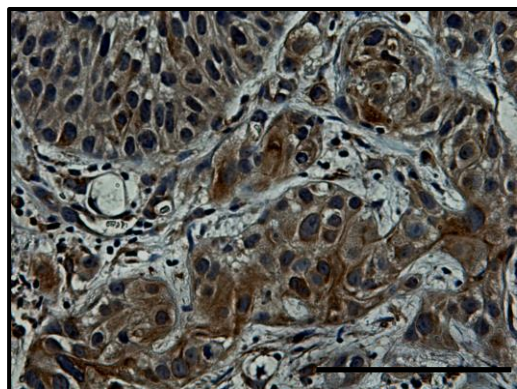**400  $\times$**
